# Supplementary material for: Variability in terrigenous sediment supply offshore of the Río de la Plata (Uruguay) recording the continental climatic history over the past 1200 years
Source: Copernicus journal article supplement (doi:10.5194/cp-12-623-2016), 2016-03-14

Supplement of *Clim. Past*, 12, 623–634, 2016  
<http://www.clim-past.net/12/623/2016/>  
doi:10.5194/cp-12-623-2016-supplement  
© Author(s) 2016. CC Attribution 3.0 License.

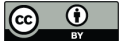

Climate  
of the Past

Open Access

The logo for the European Geosciences Union (EGU), featuring the letters 'EGU' in a bold, sans-serif font, with a stylized gear or circular arrow around the 'E'.

*Supplement of*

## **Variability in terrigenous sediment supply offshore of the Río de la Plata (Uruguay) recording the continental climatic history over the past 1200 years**

**Laura Perez et al.**

*Correspondence to:* Laura Perez (lp3\_3@hotmail.com)

The copyright of individual parts of the supplement might differ from the CC-BY 3.0 licence.

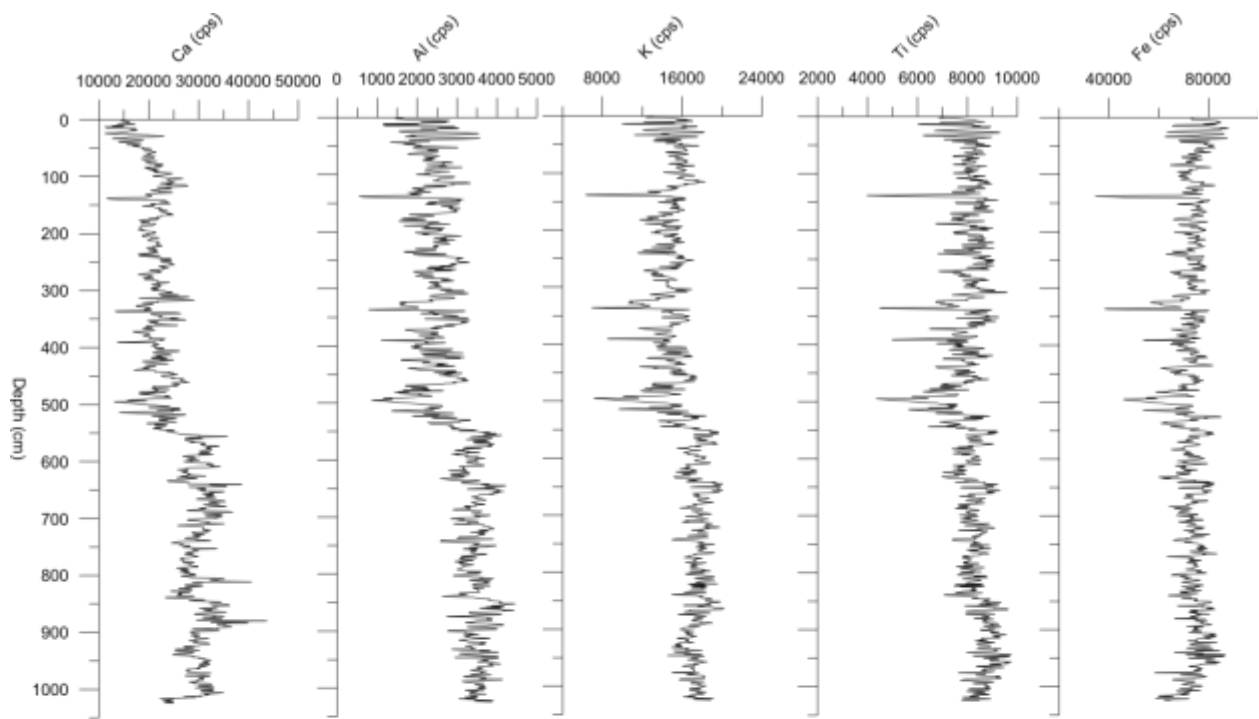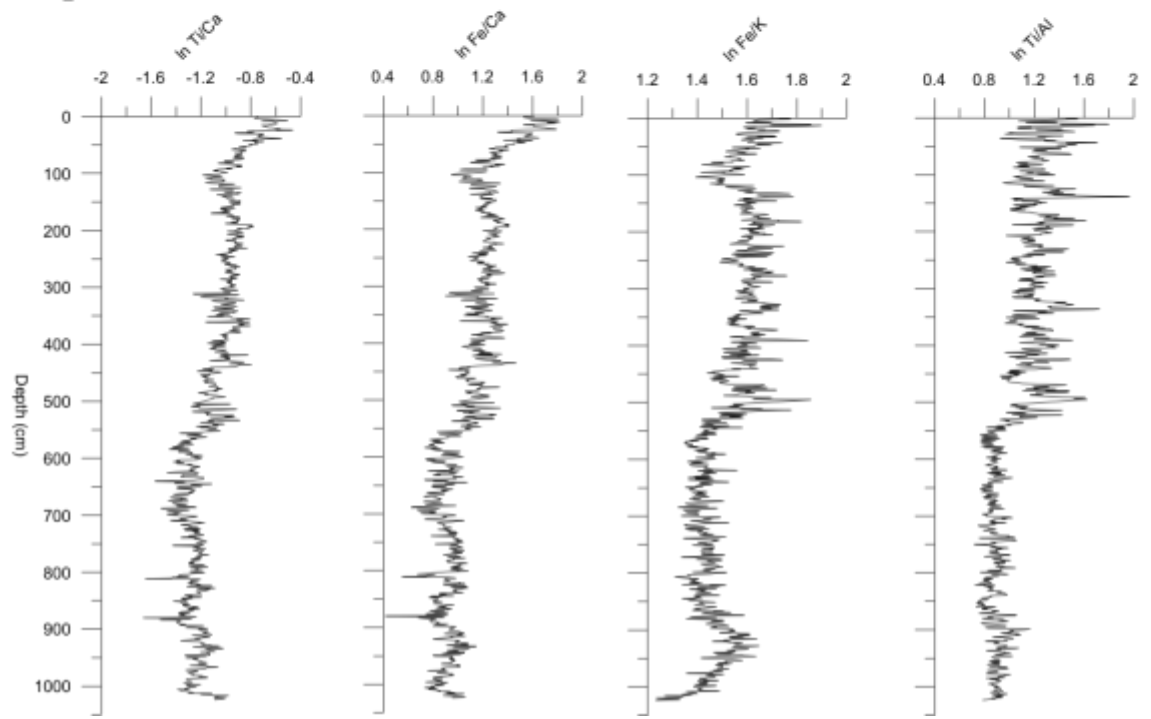

Supplement: Supplementary file 1 [file cp-12-623-2016-supplement.pdf]
